# Supplementary material
Source: HighWire-hosted journal article supplement (https://jnm.snmjournals.org/highwire/filestream/95332/field_highwire_adjunct_files/0/209155_Supplemental_Data.pdf)
Supplement: 209155_Supplemental_Data.pdf [file 209155_Supplemental_Data.pdf]

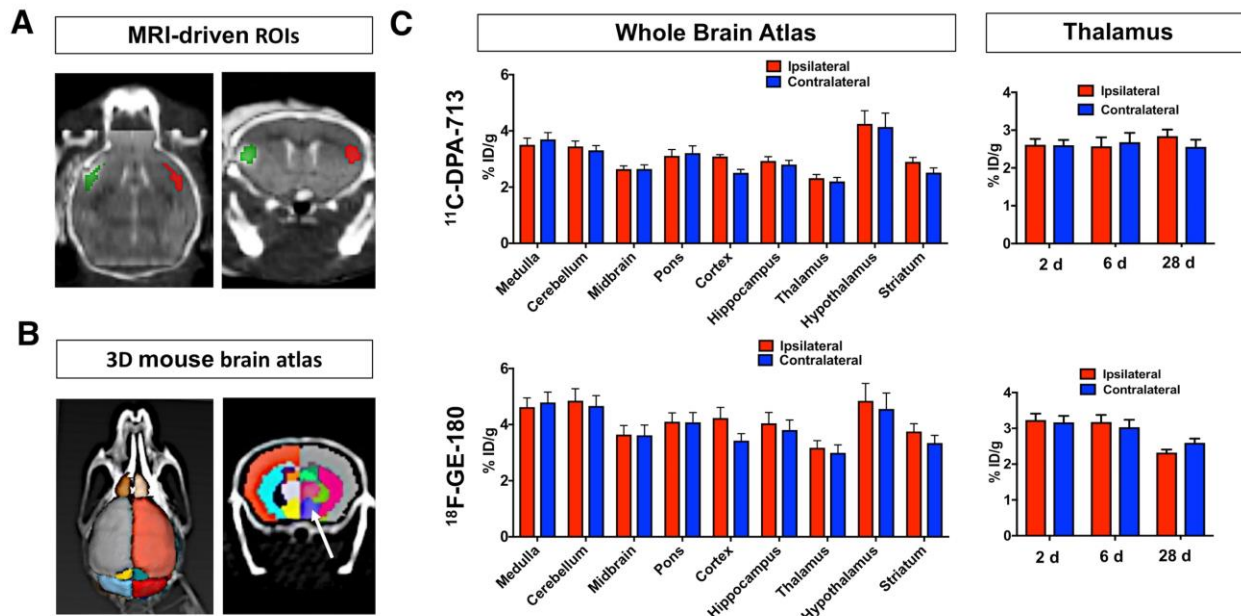

**Supplementary Figure 1.** MRI-driven ROI analysis (A). 3D mouse brain atlas analysis (B).

Results from whole brain atlas revealed the contralateral thalamus as a suitable pseudo-reference region (C).

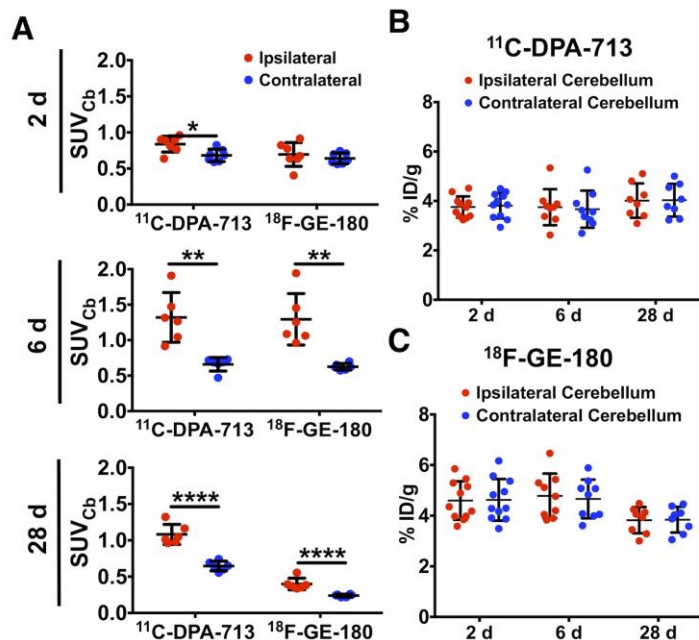

**Supplemental Figure 2.** PET image quantification of  $^{11}\text{C}$ -DPA-713 and  $^{18}\text{F}$ -GE-180 uptake in dMCAO mice using the ipsilateral cerebellum ( $\text{SUV}_{\text{Cb}}$ ) (A).  $^{11}\text{C}$ -DPA-713 (B) and  $^{18}\text{F}$ -GE-180 (C) uptake in the ipsilateral and contralateral cerebellum did not differ in dMCAO mice over time.

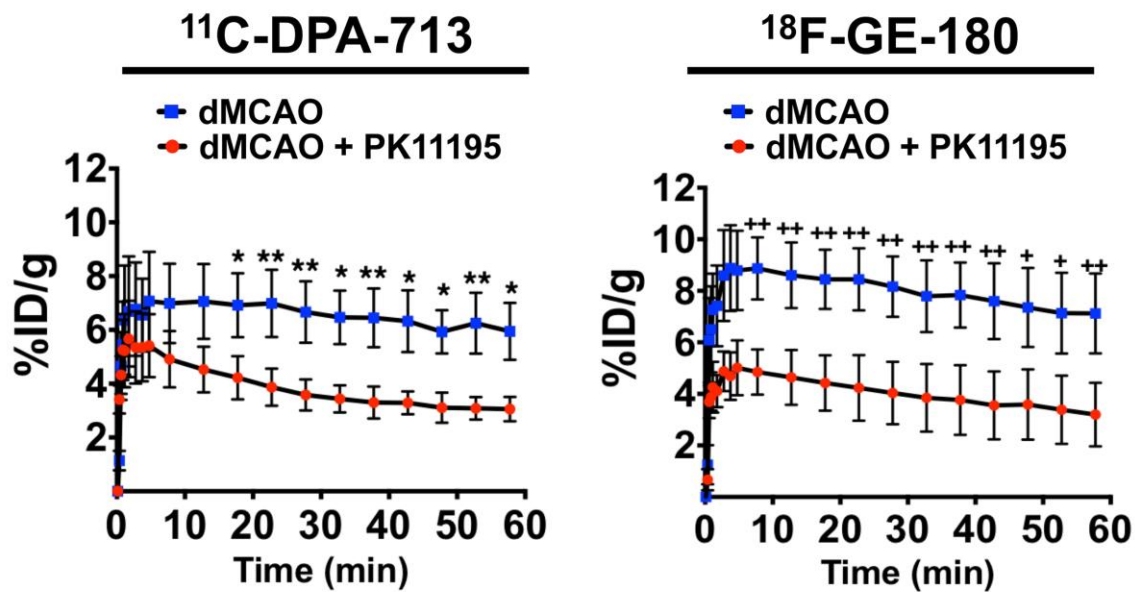

**Supplemental Figure 3.** Time activity curves depicting tracer uptake in the infarct of dMCAO mice with and without pre-blocking with PK11195 (3mg/kg) at 6 days post-stroke (mean ± SD). Wilcoxon matched paired test (\*p<0.05, \*\*p<0.01, +p<0.001, ++p<0.0001).

## 2 d Sham

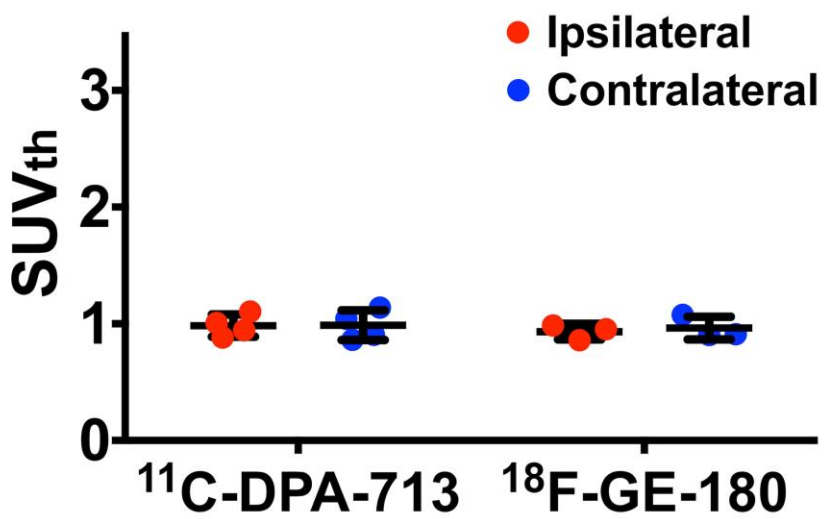

**Supplemental Figure 4.** <sup>11</sup>C-DPA-713 and <sup>18</sup>F-GE-180 uptake (SUV<sub>Th</sub>) in ipsilateral and contralateral ROIs in sham mice 2 days post-surgery (mean ± SD).

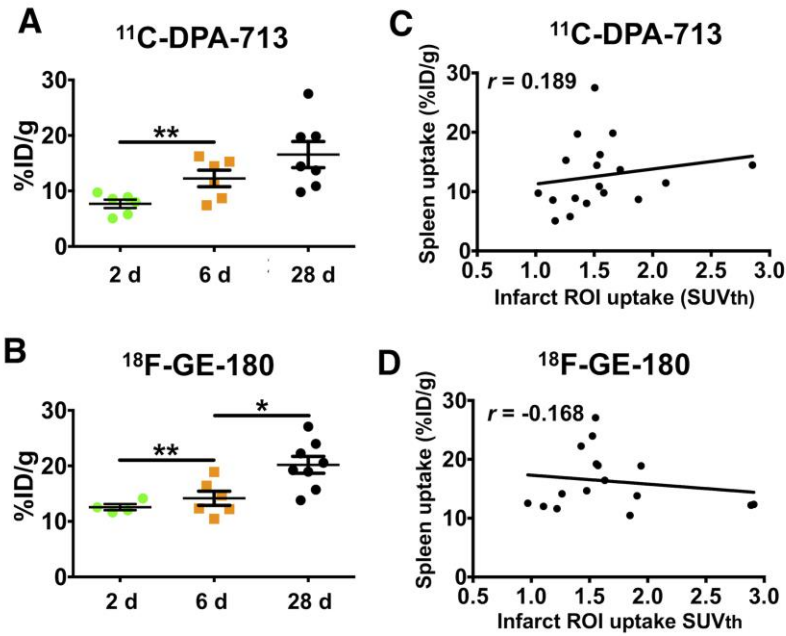

**Supplemental Figure 5.**  $^{11}\text{C}$ -DPA-713 and  $^{18}\text{F}$ -GE-180 spleen uptake (%ID/g) (A, B).

Relationship between spleen uptake (%ID/g) and infarct uptake (SUV<sub>Th</sub>) using Pearson's correlation for  $^{11}\text{C}$ -DPA-713 (C) and  $^{18}\text{F}$ -GE-180 (D).

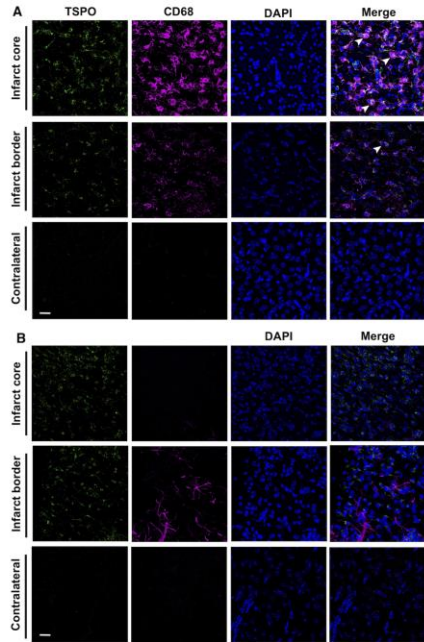

**Supplemental Figure 6.** Immunofluorescent TSPO/CD68 (A) and TSPO/GFAP (B) double staining depicting that expression of TSPO is primarily in CD68-positive but not GFAP-positive cells at 6 days post-dMCAO.
